# Supplementary material
Source: PubMed Central journal article supplement (PMC7436196)

# Supplementary Figure 1

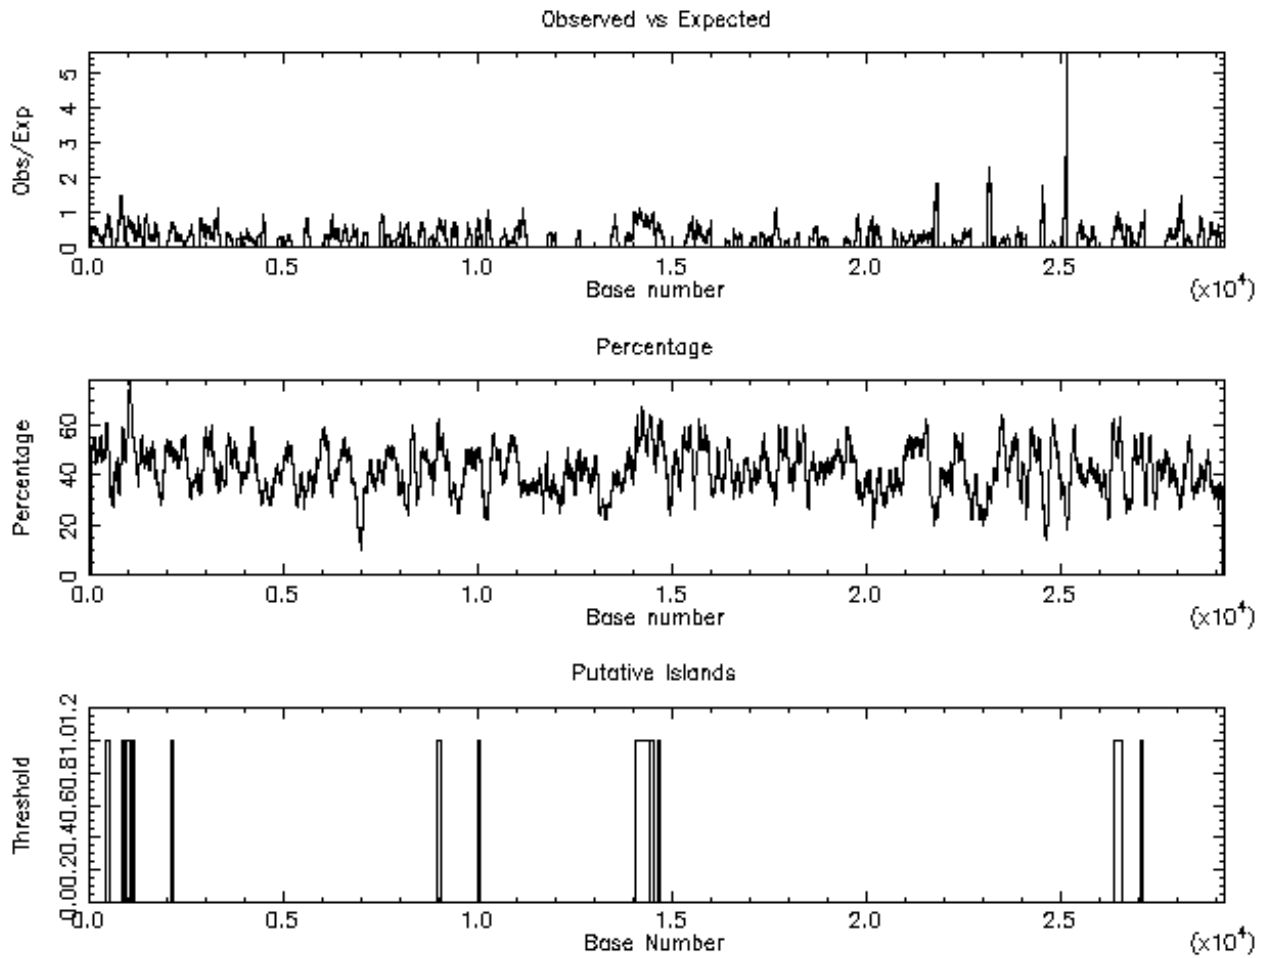

## CPGPLOT islands of unusual CG composition

EMBOSS\_001 from 1 to 28099

Observed/Expected ratio > 0.60

Percent C + Percent G > 50.00 Length > 50

Length 51 (982..1032)

Length 101 (7852..7952)

Length 56 (8876..8931)

Length 371 (12917..13287)

Length 122 (13289..13410)

Length 61 (13504..13564)

Length 169 (25281..25449)

Length 63 (25943..26005)

Supplementary Figure 2

**A**

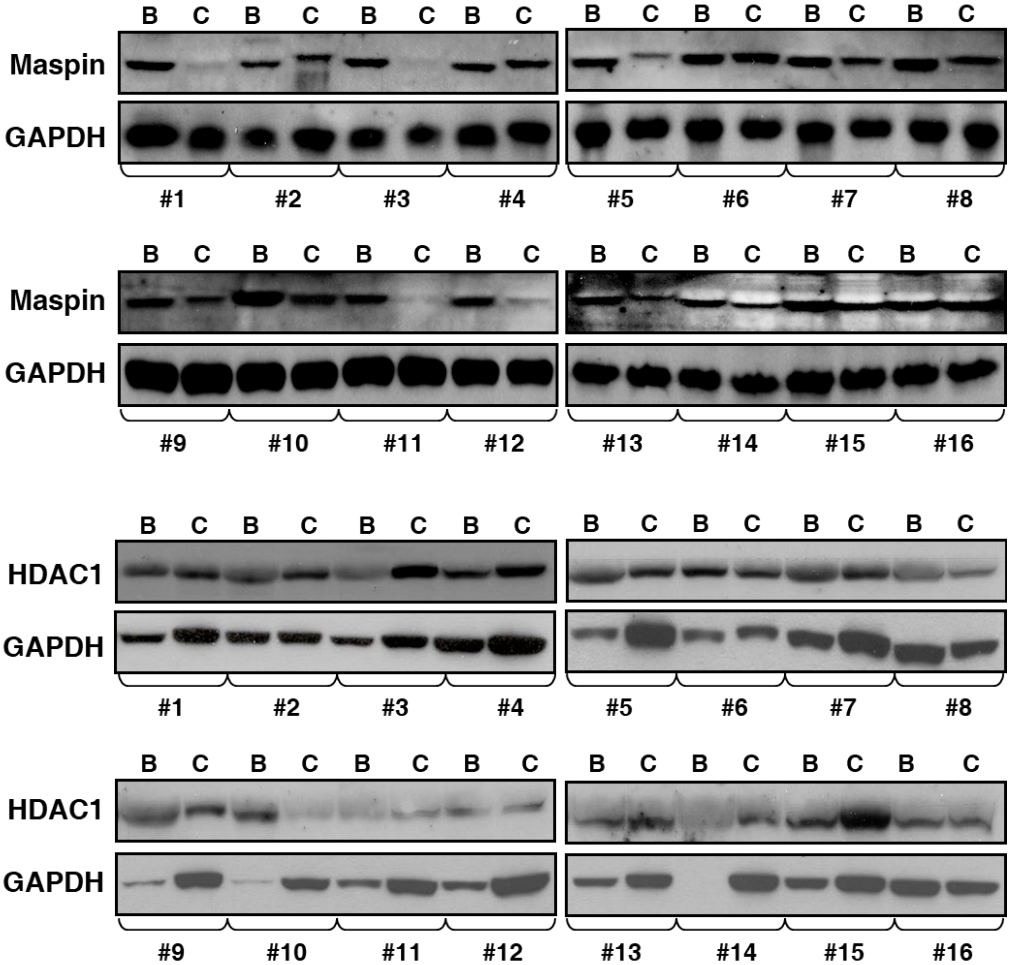

**B**

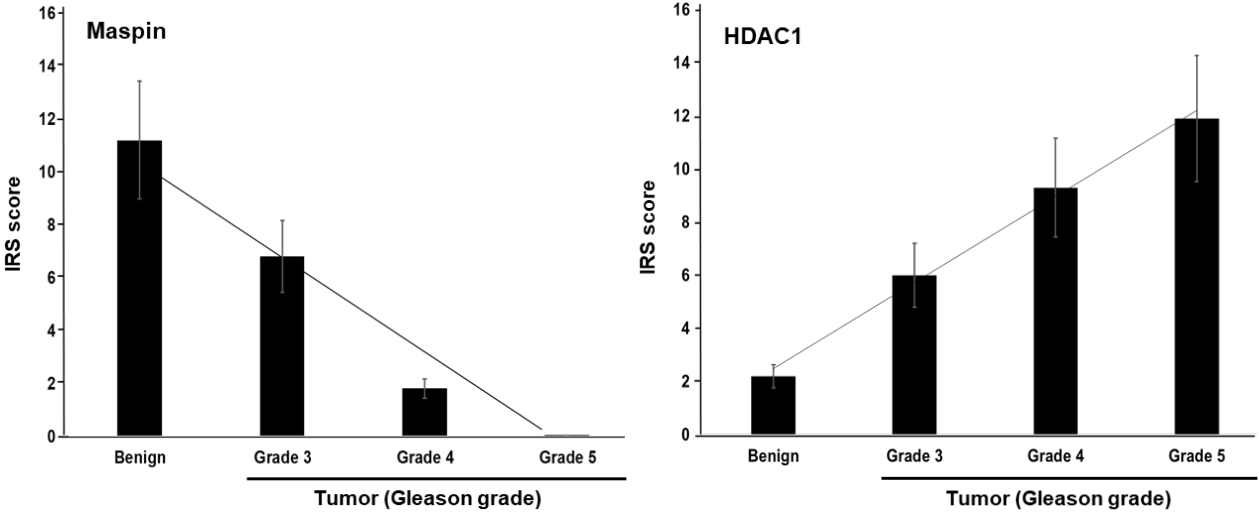

Supplementary Figure 3

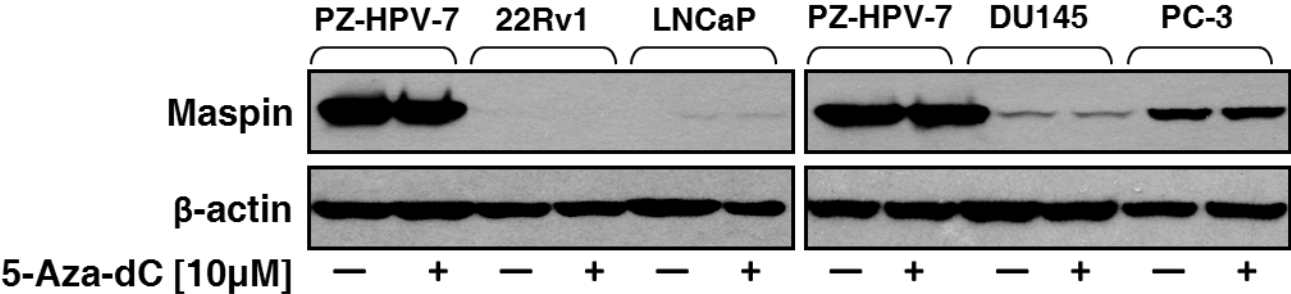

Supplement: NIHMS1615591-supplement-supp_figures.pdf [file NIHMS1615591-supplement-supp_figures.pdf]
